# Supplementary material
Source: PubMed Central journal article supplement (PMC5876813)
Supplement: jamadermatol-154-661-s001.pdf [file jamadermatol-154-661-s001.pdf]

## Supplementary Online Content

Nguyen HL, Bonadurer GF III, Tollefson MM. Vascular malformations and health-related quality of life: a systematic review and meta-analysis. *JAMA Dermatol*. Published online March 21, 2018. doi:10.1001/jamadermatol.2018.0002

**eTable.** Skindex-29 Scores and Comparisons of Patients With Klippel-Trenaunay Syndrome Against Those With Other Diseases

### eReferences

This supplementary material has been provided by the authors to give readers additional information about their work.

**eTable. Skindex-29 Scores and Comparisons of Patients With Klippel-Trenaunay Syndrome Against Those With Other Diseases**

| <b>Diseases</b>                                      | <b>n</b> | <b>Symptoms,<br/>mean (SD)</b> | <b>P value</b> | <b>Emotions,<br/>mean (SD)</b> | <b>P value</b> | <b>Functionin<br/>g, mean<br/>(SD)</b> | <b>P value</b> | <b>Total</b> |
|------------------------------------------------------|----------|--------------------------------|----------------|--------------------------------|----------------|----------------------------------------|----------------|--------------|
| <b>Vulvodynia<sup>1</sup></b>                        | 98       | 50.0 (17.0)                    | < 0.0001*      | 50.0 (20.0)                    | < 0.0001*      | 44.0 (22.0)                            | < 0.0001*      | 48.0         |
| <b>Dermatomyositis<sup>2</sup></b>                   | 41       | 44.9 (24.3)                    | < 0.0001*      | 50.4 (26.1)                    | < 0.0001*      | 28.2 (26.6)                            | 0.0083*        | 41.2         |
| <b>Lichen sclerosus<sup>3</sup></b>                  | 262      | 46.8 (19.0)                    | < 0.0001*      | 38.2 (20.2)                    | < 0.0001*      | 33.6 (19.3)                            | < 0.0001*      | 39.5         |
| <b>Tinea (any<br/>location)</b>                      | 22       | 44.7 (24.3)                    | 0.0003*        | 42.5 (26.2)                    | < 0.0001*      | 31.3 (25.0)                            | 0.0035*        | 39.5         |
| <b>Cutaneous lupus<br/>erythematosus<sup>4</sup></b> | 157      | 40.0 (23.0)                    | < 0.0001*      | 48 (28.0)                      | < 0.0001*      | 28.0 (25.0)                            | 0.0008*        | 38.7         |
| <b>Eczema</b>                                        | 102      | 48.4 (22.7)                    | < 0.0001*      | 40.9 (27.1)                    | < 0.0001*      | 26.2 (26.2)                            | 0.0104*        | 38.5         |
| <b>Epidermolysis<br/>Bullosa<sup>5</sup></b>         | 75       | 49.0 (25.0)                    | < 0.0001*      | 35.0 (26.0)                    | 0.0005*        | 31.0 (24.0)                            | < 0.0001*      | 38.3         |
| <b>Pemphigus<sup>6</sup></b>                         | 126      | 37.0 (22.0)                    | 0.0004*        | 37.0 (22.0)                    | < 0.0001*      | 33.0 (23.0)                            | < 0.0001*      | 35.7         |
| <b>Psoriasis</b>                                     | 44       | 42.1 (21.2)                    | < 0.0001*      | 38.9 (27.2)                    | < 0.0001*      | 22.8 (26.6)                            | 0.1717         | 34.6         |
| <b>Chronic hand<br/>dermatitis<sup>7</sup></b>       | 140      | 32.0 (23.2)                    | 0.0551         | 17.2 (16.9)                    | 0.0607         | 50.5 (21.1)                            | < 0.0001*      | 33.2         |
| <b>Morphea<sup>8</sup></b>                           | 73       | 32.8 (22.8)                    | 0.0513         | 40.8 (26.2)                    | < 0.0001*      | 22.0 (22.9)                            | 0.1570         | 31.9         |
| <b>Acne vulgaris</b>                                 | 63       | 30.0 (19.0)                    | 0.2254         | 40.5 (24.8)                    | < 0.0001*      | 15.5 (16.3)                            | 0.5324         | 28.7         |
| <b>Rosacea</b>                                       | 29       | 32.6 (19.6)                    | 0.1260         | 33.3 (20.3)                    | 0.0077*        | 16.0 (18.0)                            | 0.7353         | 27.3         |
| <b>Facial PWS<sup>9</sup></b>                        | 244      | 14.9 (18.4)                    | < 0.0001*      | 34.4 (25.8)                    | < 0.0001*      | 24.3 (22.3)                            | 0.0118*        | 24.6         |
| <b>Alopecia</b>                                      | 7        | 31.5 (23.9)                    | 0.4885         | 27.0 (32.7)                    | 0.5243         | 14.1 (22.7)                            | 0.6521         | 24.2         |
| <b>Onychomycosis</b>                                 | 31       | 33.9 (22.2)                    | 0.0714         | 25.7 (22.1)                    | 0.3693         | 10.7 (12.6)                            | 0.0588         | 23.4         |
| <b>Cutaneous T-cell<br/>lymphoma<sup>10</sup></b>    | 22       | 19.1 (7.2)                     | 0.1111         | 23.9 (8.9)                     | 0.6321         | 24.2 (10.4)                            | 0.0816         | 22.4         |
| <b>Vitiligo<sup>11</sup></b>                         | 245      | 13.9 (14.6)                    | < 0.0001*      | 35.9 (23.6)                    | < 0.0001*      | 16.7 (19.5)                            | 0.8086         | 22.2         |

|                                                    |     |             |           |             |           |             |           |      |
|----------------------------------------------------|-----|-------------|-----------|-------------|-----------|-------------|-----------|------|
| <i>Klippel Trenaunay</i>                           | 78  | 26.0 (19.7) | -         | 21.9 (18.9) | -         | 17.3 (17.5) | -         | 21.7 |
| <b>Nonmelanoma skin cancer / actinic keratosis</b> | 136 | 29.1 (20.3) | 0.2784    | 20.4 (18.6) | 0.5730    | 9.1 (14.0)  | 0.0002*   | 19.5 |
| <b>Wart</b>                                        | 24  | 22.9 (18.4) | 0.4954    | 21.6 (16.0) | 0.9441    | 6.4 (12.7)  | 0.0057*   | 17.0 |
| <b>No skin disease</b>                             | 107 | 13.8 (11.9) | < 0.0001* | 9.2 (12.8)  | < 0.0001* | 3.7 (8.3)   | < 0.0001* | 8.9  |

\*denotes statistical significant ( $p \leq 0.05$ ). The total score is the mean of the three Skindex-29 subscores in ascending order. Data are taken from published literatures and directly from the author of the Skindex-29, Dr Mary-Margaret Chren, MD.

## eReferences

1. Ponte M, Klemperer E, Sahay A, Chren MM. Effects of vulvodynia on quality of life. *J Am Acad Dermatol*. 2009;60(1):70-76.
2. Goreski R, Chock M, Foering K, et al. Quality of life in dermatomyositis. *J Am Acad Dermatol*. 2011;65(6):1107-1116.
3. Lansdorp CA, van den Hondel KE, Korfage IJ, van Gestel MJ, van der Meijden WI. Quality of life in Dutch women with lichen sclerosus. *Br J Dermatol*. 2013;168(4):787-793.
4. Klein R, Moghadam-Kia S, Taylor L, et al. Quality of life in cutaneous lupus erythematosus. *J Am Acad Dermatol*. 2011;64(5):849-858.
5. Tabolli S, Sampogna F, Di Pietro C, et al. Quality of life in patients with epidermolysis bullosa. *Br J Dermatol*. 2009;161(4):869-877.
6. Paradisi A, Sampogna F, Di Pietro C, et al. Quality-of-life assessment in patients with pemphigus using a minimum set of evaluation tools. *J Am Acad Dermatol*. 2009;60(2):261-269.
7. Fowler JF, Ghosh A, Sung J, et al. Impact of chronic hand dermatitis on quality of life, work productivity, activity impairment, and medical costs. *J Am Acad Dermatol*. 2006;54(3):448-457.
8. Klimas NK, Shedd AD, Bernstein IH, Jacobe H. Health-related quality of life in morphea. *Br J Dermatol*. 2015;172(5):1329-1337.
9. Hagen SL, Grey KR, Korta DZ, Kelly KM. Quality of life in 12 adults with facial port-wine stains. *J Am Acad Dermatol*. 2017;76(4):695-702.
10. Demierre MF, Tien A, Miller D. Health-related quality-of-life assessment in patients with cutaneous T-cell lymphoma. *Arch Dermatol*. 2005;141(3):325-330.
11. Linthorst Homan MW, Spuls PI, de Korte J, Bos JD, Sprangers MA, van der Veen JP. The burden of vitiligo: patient characteristics associated with quality of life. *J Am Acad Dermatol*. 2009;61(3):411-420.
